# Supplementary material for: Melatonin attenuates MPP+-induced autophagy via heat shock protein in the Parkinson’s disease mouse model
Source: PeerJ journal article supplement (doi:10.7717/peerj.18788), 2025-01-21
Supplement: Rawdata.zip [file Rawdata.zip]

## Sheet: Figure-1
Group	time(s)	dastance(cm)	speed(cm/s)		Group	Center area entry (times)
control-1	60	326.82	5.447		control-1	14
control-2	60	229.78	3.82967		control-2	11
control-3	60	230.17	3.83617		control-3	9
MPTP-1	60	32.43	0.5405		MPTP-1	5
MPTP-2	60	53.33	0.888833		MPTP-2	5
MPTP-3	60	67.63	1.12717		MPTP-3	4
MPTP+MT-1	60	266.42	4.44033		MPTP+MT-1	8
MPTP+MT-2	60	150.98	2.51633		MPTP+MT-2	8
MPTP+MT-3	60	273.53	4.55883		MPTP+MT-3	9
MT-1	60	371.08	6.18467		MT-1	4
MT-2	60	262.24	4.37067		MT-2	7
MT-3	60	370.62	6.177		MT-3	6

## Sheet: Figure-2
Group	Area（sum）	IOD（sum）	IOD/Area
control-1_20.0x-1	1601328	201635	0.125917
control-1_20.0x-2	1793774	239403	0.133463
control-1_20.0x-3	1948702	306845	0.157461
control-2_20.0x-1	1918882	218270	0.113749
control-2_20.0x-2	1923648	212525	0.11048
control-2_20.0x-3	1816108	197023	0.108486
control-3_20.0x-1	1884326	250711	0.133051
control-3_20.0x-2	1947267	248436	0.127582
control-3_20.0x-3	1738374	230829	0.132785
MPTP-1_20.0x-1	1917602	171598	0.089486
MPTP-1_20.0x-2	1845317	172128	0.0932781
MPTP-1_20.0x-3	1921141	175931	0.0915762
MPTP-2_20.0x-1	1350115	132509	0.0981462
MPTP-2_20.0x-2	937778	103677	0.110556
MPTP-2_20.0x-3	775851	86211.3	0.111118
MPTP-3_20.0x-1	1648271	165036	0.100127
MPTP-3_20.0x-2	1473144	153024	0.103876
MPTP-3_20.0x-3	1837085	183234	0.0997417
MPTP+MT-1_20.0x-1	1903000	186081	0.097783
MPTP+MT-1_20.0x-2	1922740	209117	0.10876
MPTP+MT-1_20.0x-3	1945404	208485	0.107168
MPTP+MT-2_20.0x-1	1950462	219542	0.112559
MPTP+MT-2_20.0x-2	1948998	226678	0.116305
MPTP+MT-2_20.0x-3	1937596	213340	0.110106
MPTP+MT-3_20.0x-1	1942221	200972	0.103476
MPTP+MT-3_20.0x-2	1949303	234903	0.120506
MPTP+MT-3_20.0x-3	1871138	182668	0.0976243
MT-1_20.0x-1	1818319	245290	0.134899
MT-1_20.0x-2	1952432	281450	0.144154
MT-1_20.0x-3	1951795	283675	0.14534
MT-2_20.0x-1	1912185	186044	0.0972939
MT-2_20.0x-2	1722220	174820	0.101509
MT-2_20.0x-3	1902281	199857	0.105062
MT-3_20.0x-1	1926254	184276	0.0956653
MT-3_20.0x-2	1936971	203474	0.105048
MT-3_20.0x-3	1928317	197705	0.102527
